# Supplementary material for: Tissue iron is negatively correlated with TERC or TERT mRNA expression: a heterochronic parabiosis study in mice
Source: Aging (Albany NY). 2018 Dec 16;10(12):3834–50. doi: 10.18632/aging.101676 (PMC6326661; doi:10.18632/aging.101676)
Supplement: Supplementary Figure 1 [file aging-10-101676-s001.pdf]

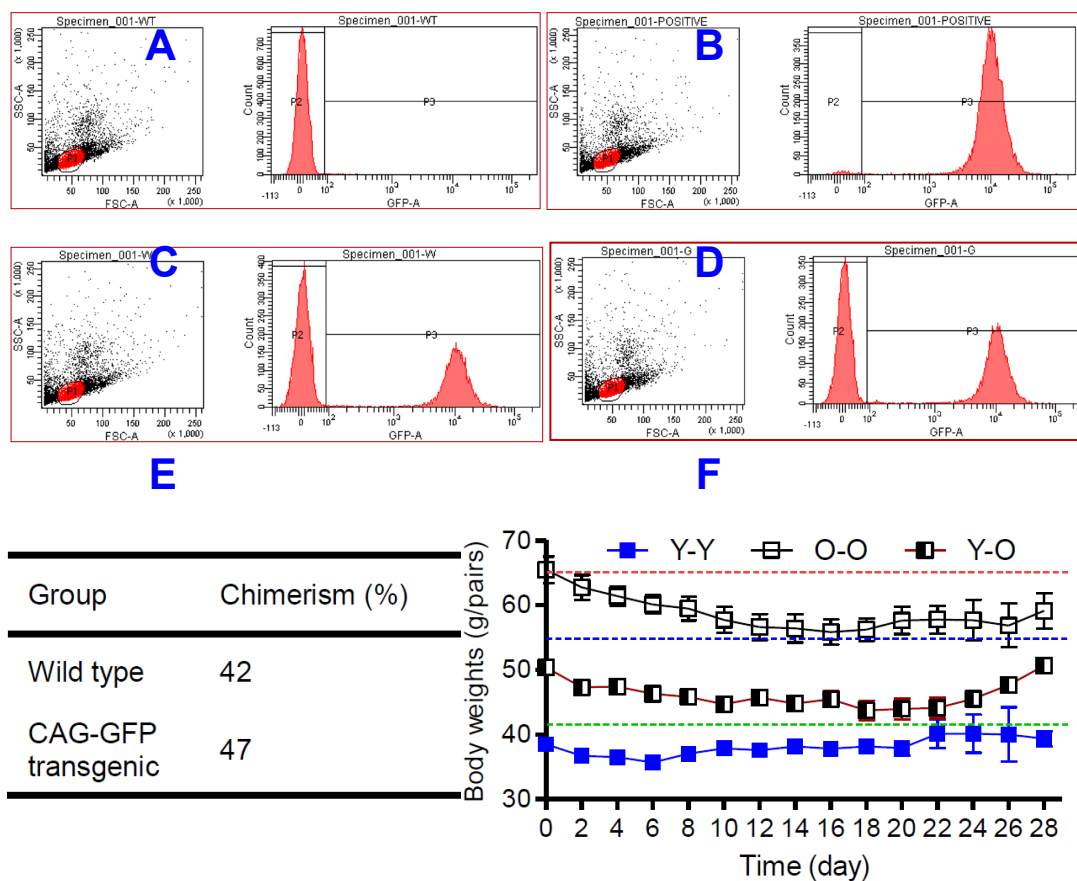

**Supplementary Figure 1. Blood chimerism of a heterochronic parabiotic model.** To verify the blood chimerism in parabiotic mice, GFP mice were used and the percentage of GFP<sup>+</sup> cells in the spleen was analyzed via flow cytometry in each wild-type animal connected to the GFP<sup>+</sup> parabiotic partner after 4 weeks, postoperatively. Non-connected wild type or GFP mice were seen as negative (A) and positive controls (B). Flow cytometry analysis showed that the blood chimerism of parabiotic wild type (C) and GFP (D) mice was 42% and 47% respectively (E), consistent with the establishment of parabiotic cross-circulation. Data shown in F are changes in the body weights of Y-O, Y-Y and O-O mice.
