# Supplementary material for: Tissue iron is negatively correlated with TERC or TERT mRNA expression: a heterochronic parabiosis study in mice
Source: publisher site journal article supplement (doi:10.18632/aging.101676), 2018-12-16
Supplement: Supplementary file [file aging-v10i12-101676-supplementary-material-SD2.pdf]

**Supplementary Table 1. Primer sequences.**

| Names          | Sequences(5'-3')                                |
|----------------|-------------------------------------------------|
| $\beta$ -actin | Forward AAATCGTGCGTGACATCAAAGA                  |
|                | Reverse GCCATCTCCTGCTCGAAGTC                    |
| TERC           | Forward TGTGGGTTCTGGTCTTTTGTCTCCG               |
|                | Reverse GTTTTTGAGGCTCGGGAACGCG                  |
| TERT           | Forward GGATTGCCACTGGCTCCG                      |
|                | Reverse TGCCTGACCTCCTCTTGTGAC                   |
| Telomere       | Forward GGTTTTTGAGGGTGAGGGTGAGGGTGAGGGTGAGGGT   |
|                | Reverse TCCCGACTATCCCTATCCCTATCCCTATCCCTATCCCTA |
| 36B4           | Forward CTCACTCCATCATCAATGGATACAA               |
|                | Reverse CAGCCAGTGGGAAGGTGTAGTCA                 |
